# Supplementary material for: Nasopharyngeal SARS-CoV-2 viral loads in young children do not differ significantly from those in older children and adults
Source: PubMed Central journal article supplement (PMC7862672; doi:10.1038/s41598-021-81934-w), 2021-02-04

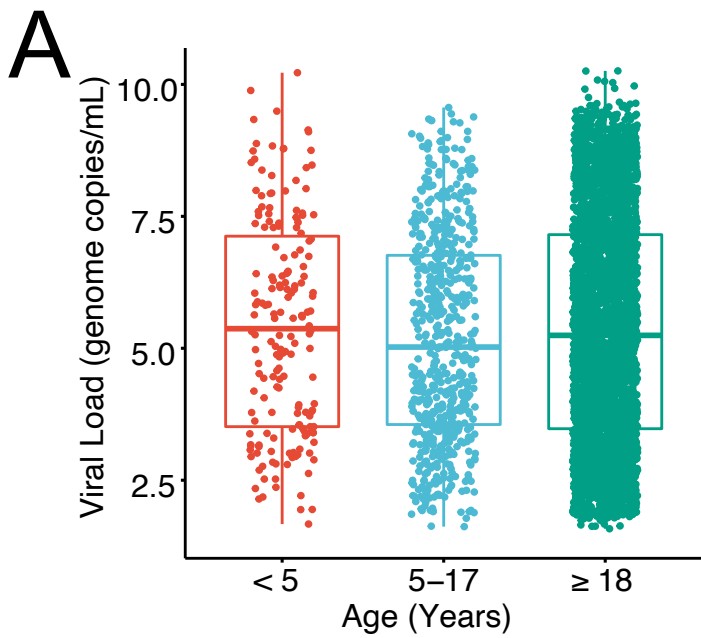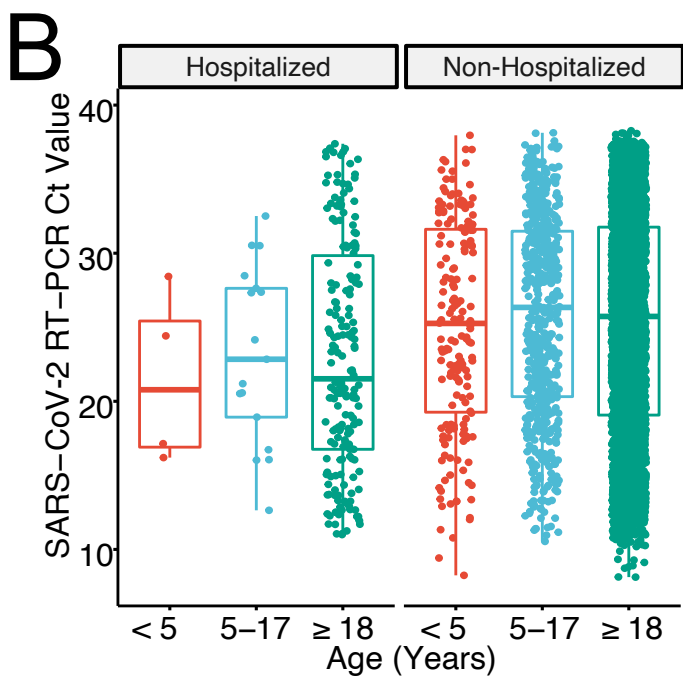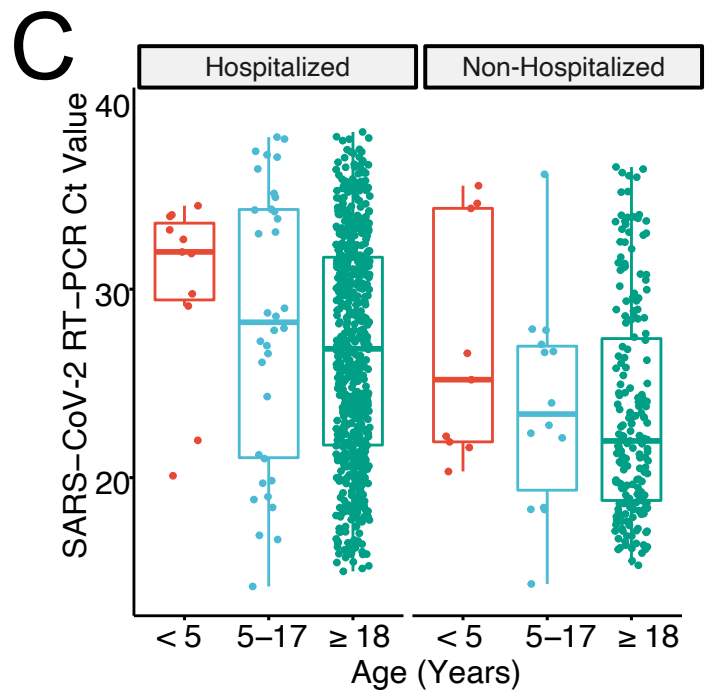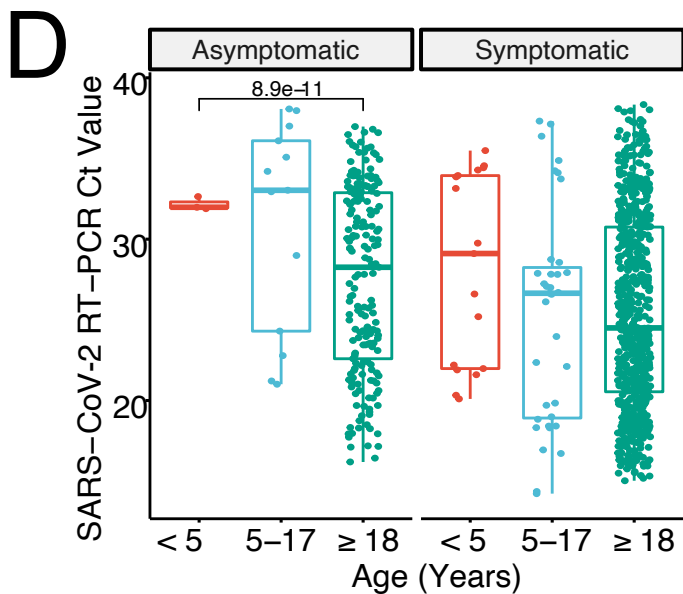

Supplement: 41598_2021_81934_MOESM1_ESM.pdf [file 41598_2021_81934_MOESM1_ESM.pdf]
