# Supplementary material for: Nasopharyngeal SARS-CoV-2 viral loads in young children do not differ significantly from those in older children and adults
Source: PubMed Central journal article supplement (PMC7862672; doi:10.1038/s41598-021-81934-w), 2021-02-04
Supplement: 41598_2021_81934_MOESM2_ESM.pdf [file 41598_2021_81934_MOESM2_ESM.pdf]

# A

## Laboratory B Defined Symptoms

---

- Fever  $\geq 100^{\circ}\text{F}$  or  $37.8^{\circ}\text{C}$
- Shortness of breath or difficulty breathing
- Chills
- Repeated shaking with chills
- Muscle pain
- Headache
- Sore throat (not due to a chronic condition)
- New loss of taste and smell
- Diarrhea

# B

## Laboratory A

| Age (Years)      | <b>&lt;5</b> | <b>5-17</b> | <b><math>\geq 18</math></b> |
|------------------|--------------|-------------|-----------------------------|
| Total            | 179          | 617         | 3823                        |
| Hospitalized     | 4            | 17          | 186                         |
| Non-hospitalized | 175          | 600         | 3637                        |

## Laboratory B

| Age (Years)      | <b>&lt;5</b> | <b>5-17</b> | <b><math>\geq 18</math></b> |
|------------------|--------------|-------------|-----------------------------|
| Total            | 20           | 48          | 857                         |
| Hospitalized     | 9            | 14          | 203                         |
| Non-hospitalized | 11           | 34          | 654                         |
| Symptomatic      | 17           | 35          | 664                         |
| Asymptomatic     | 3            | 13          | 193                         |
